# Supplementary material for: Genome-Wide Genetic Structure of Henan Indigenous Chicken Breeds
Source: MDPI journal article supplement (doi:10.3390/ani13040753), 2023-02-19
Supplement: s1 [file s1]

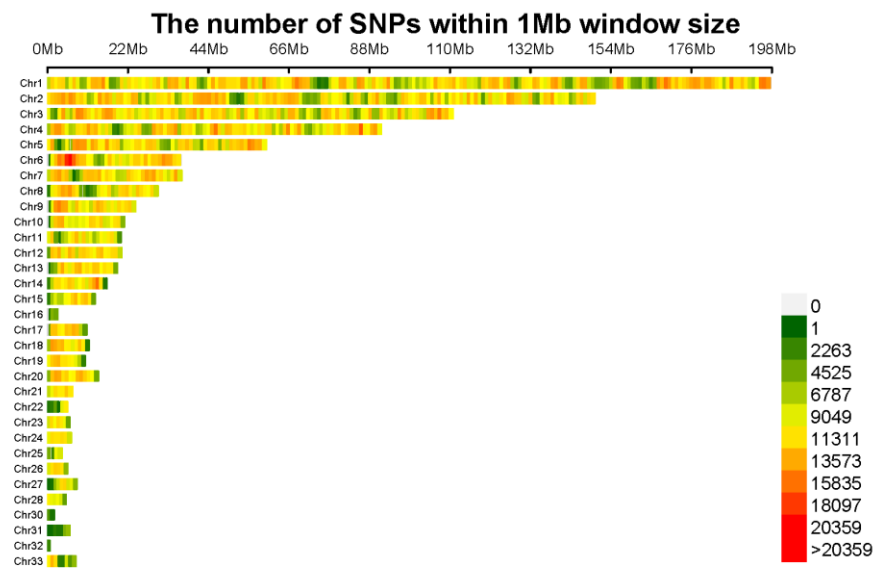

Figure S1: SNP density map.

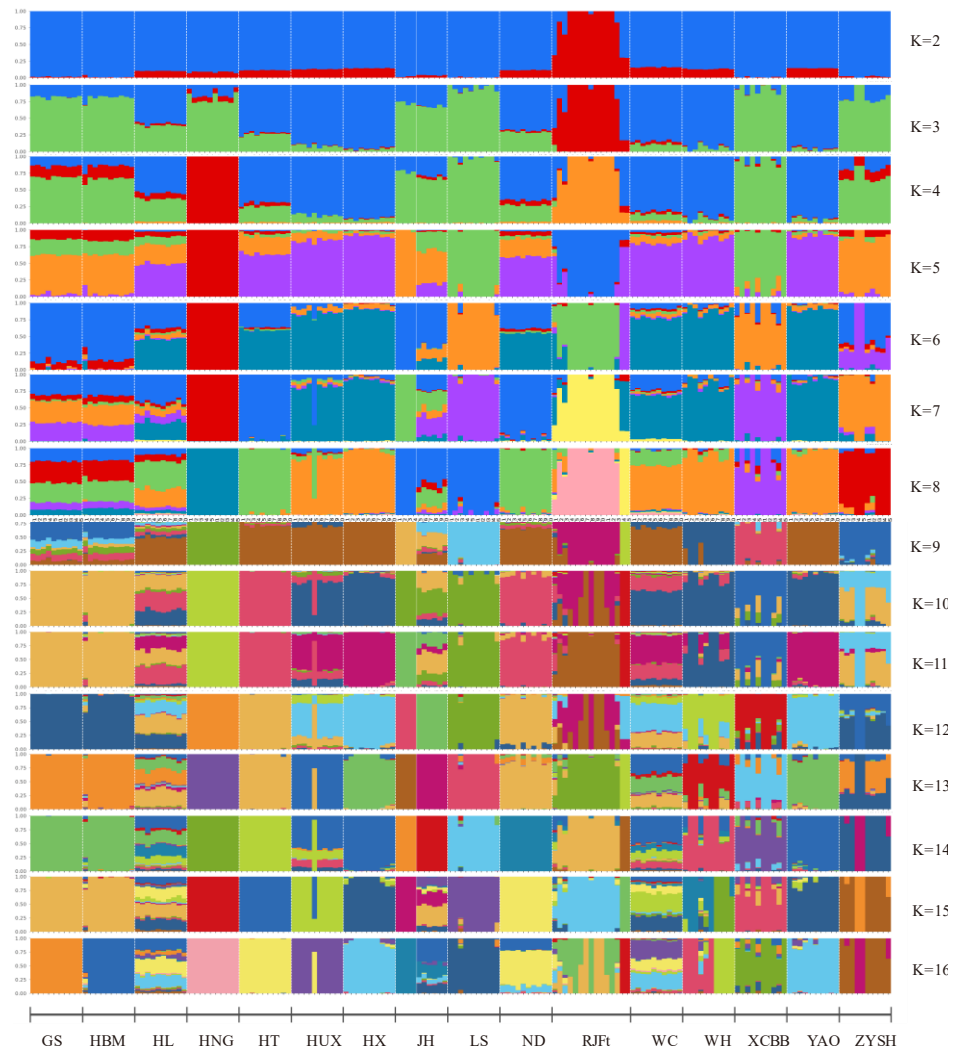

Figure S2. Admixture analysis across 16 chicken populations. Pro-portions of geneticancestry for 16 chicken populations with K=2-16 (K represents the number of inferred ancestral populations).

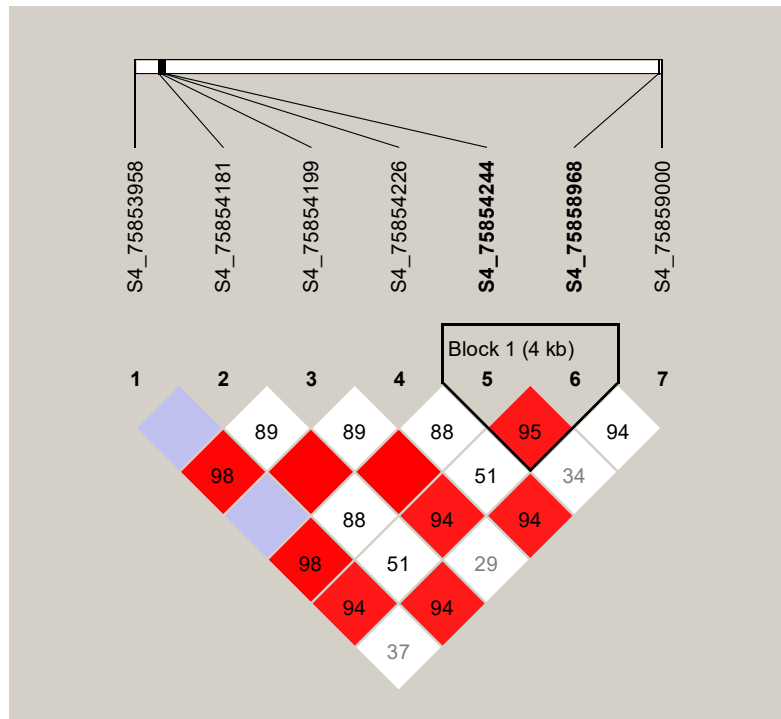

Figure S3: 6 SNPs on *LCORL* gene LD block.
